# Supplementary material for: Amphiregulin Expression Is a Predictive Biomarker for EGFR Inhibition in Metastatic Colorectal Cancer: Combined Analysis of Three Randomized Trials
Source: Oxford University Press journal article supplement (doi:10.1158/1078-0432.ccr-20-2748), 2020-09-17
Supplement: 10780432ccr202748-sup-247306_2_supp_6519249_qfk60n.pdf [file 10780432ccr202748-sup-247306_2_supp_6519249_qfk60n.pdf]

| eTable 3: Outcome according to high vs. low unnormalized AREG expression in all patients and subgroups |                       |             |            |                           |                          |                       |         |                           |                          |                       |         |
|--------------------------------------------------------------------------------------------------------|-----------------------|-------------|------------|---------------------------|--------------------------|-----------------------|---------|---------------------------|--------------------------|-----------------------|---------|
| Parameter                                                                                              |                       |             |            | Overall survival          |                          |                       |         | Progression-free survival |                          |                       |         |
|                                                                                                        | AREG threshold value* | n AREG high | n AREG low | Median AREG high [months] | Median AREG low [months] | HR [95% CI]           | p value | Median AREG high [months] | Median AREG low [months] | HR [95% CI]           | p value |
| All patients (n = 675)                                                                                 | Median                | 340         | 335        | 25.7                      | 21.5                     | 0.82<br>[0.70 – 0.97] | 0.019   | 10.0                      | 8.2                      | 0.75<br>[0.65 – 0.88] | 0.000   |
| RAS WT treated with cetuximab (n = 187)                                                                | Median                | 99          | 88         | 36.6                      | 23.5                     | 0.59<br>[0.42 – 0.81] | 0.001   | 10.6                      | 8.1                      | 0.72<br>[0.53 – 0.97] | 0.029   |
| RAS WT treated with bevacizumab (n = 134)                                                              | Median                | 64          | 70         | 27.5                      | 24.7                     | 1.09<br>[0.76 – 1.56] | 0.65    | 11.1                      | 10.3                     | 1.03<br>[0.72 – 1.46] | 0.89    |
| RAS WT treated with chemotherapy (n = 94)                                                              | Median                | 45          | 49         | 23.2                      | 21.6                     | 0.65<br>[0.41 – 1.04] | 0.07    | 8.7                       | 7.6                      | 0.69<br>[0.45 – 1.08] | 0.10    |
| RAS/BRAF/PIK3CA WT & EGFR positive treated with cetuximab (n = 25)                                     | Median                | 15          | 10         | 36.0                      | 11.3                     | 0.57<br>[0.21 – 1.52] | 0.26    | 9.6                       | 4.3                      | 0.32<br>[0.12 – 0.86] | 0.023   |
| RAS/BRAF/PIK3CA WT & EGFR negative treated with cetuximab (n = 13)                                     | Median                | 7           | 6          | 40.4                      | 18.0                     | 0.35<br>[0.09 – 1.26] | 0.11    | 11.8                      | 5.9                      | 0.23<br>[0.06 – 0.95] | 0.042   |
| RAS/BRAF/PIK3CA WT & right sided tumor treated with cetuximab (n = 26)                                 | Median                | 10          | 16         | 24.5                      | 16.1                     | 0.32<br>[0.11 – 0.87] | 0.026   | 8.5                       | 4.3                      | 0.47<br>[0.21 – 1.09] | 0.08    |
| RAS/BRAF/PIK3CA WT & left sided tumor treated with cetuximab (n = 96)                                  | Median                | 54          | 42         | 38.7                      | 26.9                     | 0.75<br>[0.47 – 1.20] | 0.23    | 10.6                      | 8.8                      | 0.73<br>[0.47 – 1.11] | 0.14    |
| All patients (n = 675)                                                                                 | 3rd quartile          | 171         | 504        | 27.5                      | 23.0                     | 0.80<br>[0.66 – 0.97] | 0.02    | 10.5                      | 8.9                      | 0.81<br>[0.67 – 0.97] | 0.019   |
| RAS WT treated with cetuximab (n = 187)                                                                | 3rd quartile          | 61          | 126        | 36.6                      | 25.5                     | 0.64<br>[0.44 – 0.91] | 0.012   | 10.7                      | 8.6                      | 0.81<br>[0.59 – 1.11] | 0.19    |
| RAS WT treated with bevacizumab (n = 134)                                                              | 3rd quartile          | 33          | 101        | 28.2                      | 24.1                     | 0.96<br>[0.64 – 1.43] | 0.84    | 11.5                      | 10.7                     | 1.05<br>[0.70 – 1.56] | 0.83    |
| RAS WT treated with chemotherapy (n = 94)                                                              | 3rd quartile          | 27          | 67         | 23.2                      | 21.8                     | 0.78<br>[0.48 – 1.28] | 0.33    | 7.5                       | 8.1                      | 0.81<br>[0.50 – 1.32] | 0.40    |
| RAS/BRAF/PIK3CA WT & EGFR positive treated with cetuximab (n = 25)                                     | 3rd quartile          | 9           | 16         | 39.9                      | 14.6                     | 0.45<br>[0.16 – 1.29] | 0.14    | 11.2                      | 4.4                      | 0.50<br>[0.21 – 1.19] | 0.12    |
| RAS/BRAF/PIK3CA WT & EGFR negative treated with cetuximab (n = 13)                                     | 3rd quartile          | 5           | 8          | 31.6                      | 20.5                     | 0.53<br>[0.14 – 2.06] | 0.36    | 11.8                      | 6.5                      | 0.44<br>[0.13 – 1.50] | 0.19    |
| RAS/BRAF/PIK3CA WT & right sided tumor treated with cetuximab (n = 26)                                 | 3rd quartile          | 8           | 18         | 24.5                      | 16.1                     | 0.35<br>[0.12 – 1.05] | 0.06    | 8.5                       | 4.3                      | 0.52<br>[0.22 – 1.25] | 0.14    |
| RAS/BRAF/PIK3CA WT & left sided tumor treated with cetuximab (n = 96)                                  | 3rd quartile          | 36          | 60         | 38.3                      | 33.1                     | 0.71<br>[0.44 – 1.15] | 0.16    | 10.7                      | 8.9                      | 0.82<br>[0.53 – 1.26] | 0.36    |

**Legend:** AREG = amphiregulin; HR = hazard ratio; 95% CI = 95% confidence interval. P values were calculated by Cox regression analyses. P values < 0.05 are considered significant and displayed bold. \*For each trial, trial-specific median and 3<sup>rd</sup> quartile of AREG expression was used to dichotomize high and low expression without normalization. Patients exceeding the trial-specific threshold values were pooled as group "AREG high" and patients deceeding the trial-specific threshold value were pooled as group "AREG low".
