# Supplementary figures and images for: Amphiregulin Expression Is a Predictive Biomarker for EGFR Inhibition in Metastatic Colorectal Cancer: Combined Analysis of Three Randomized Trials
Source: Oxford University Press journal article supplement (doi:10.1158/1078-0432.ccr-20-2748), 2020-09-17

A

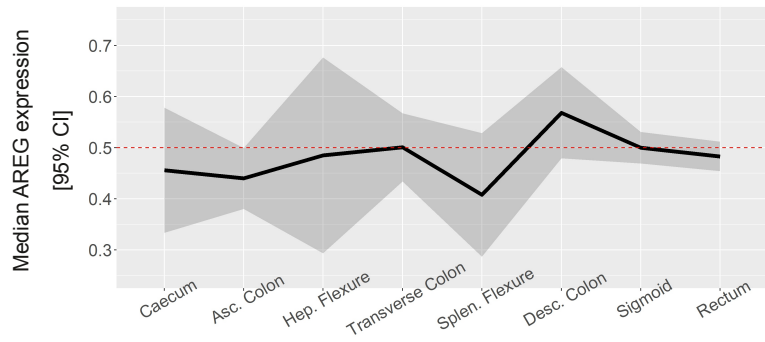

B

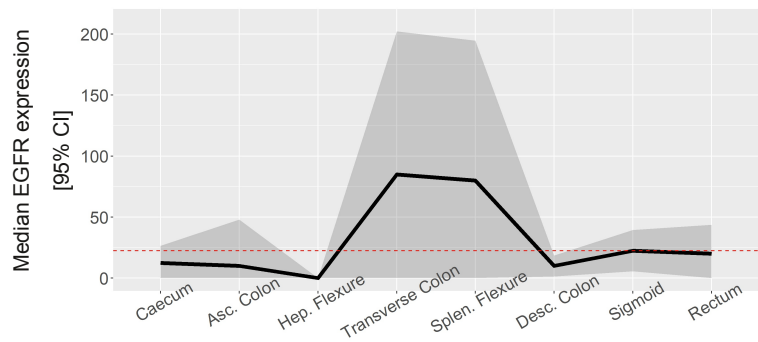

Supplement: 10780432ccr202748-sup-247306_2_supp_6519253_qfk60n.pdf [file 10780432ccr202748-sup-247306_2_supp_6519253_qfk60n.pdf]
